# Supplementary material for: Cost-Effectiveness of Operative Versus Non-Operative Treatment for Clavicle Fracture: a Systematic Literature Review
Source: PubMed Central journal article supplement (PMC7340703; doi:10.1007/s12178-020-09640-0), 2020-05-08
Supplement: 12178_2020_9640_MOESM1_ESM.pdf [file 12178_2020_9640_MOESM1_ESM.pdf]

**Title: Operative and nonoperative treatment of clavicle fractures: literature review of cost-effectiveness**

Date: **3/10/2020**

Author: Gilber Kask, MD, MBA  
Lauri Raittio B.M & B.Sc. Econ

Search words: (economic OR cost OR costs OR cost savings OR effective OR cost-effective OR cost effectiveness OR cost effectiveness) and (clavicle OR clavicular OR collarbone)

| Nr:                   | Author              | Title                                                                                                                                                                                                                                             | Year | Source          | Journal                                                                       |
|-----------------------|---------------------|---------------------------------------------------------------------------------------------------------------------------------------------------------------------------------------------------------------------------------------------------|------|-----------------|-------------------------------------------------------------------------------|
| <b>Ovid search:</b>   |                     |                                                                                                                                                                                                                                                   |      |                 |                                                                               |
|                       |                     |                                                                                                                                                                                                                                                   |      | <b>Results:</b> |                                                                               |
|                       |                     |                                                                                                                                                                                                                                                   |      | <b>513</b>      |                                                                               |
| 1                     | Sørensen et al.     | Operative Treatment of Displaced Midshaft Clavicular Fractures Is Not Cost-Effective                                                                                                                                                              | 2020 | Ovid            | J Shoulder Elbow Surg                                                         |
| 2                     | Nicolson et al.     | Routine Fixation of Displaced Midshaft Clavicle Fractures Is Not Cost-Effective: A Cost Analysis From a Randomized Controlled Trial                                                                                                               | 2019 | Ovid            | Bone Joint J                                                                  |
| 3                     | Benson et al.       | My Clavicle Fracture Definitely Warrants Surgery-Or Not So Much?: Commentary on an article by Jane Liu, MD, et al.: "Cost-Effectiveness of Operative Versus Nonoperative Treatment of Displaced Midshaft Clavicle Fractures: A Decision Analysis" | 2019 | Ovid            | Journal of Bone & Joint Surgery - American Volume                             |
| 4                     | Liu et al.          | Cost-Effectiveness of Operative Versus Nonoperative Treatment of Displaced Midshaft Clavicle Fractures: A Decision Analysis.                                                                                                                      | 2019 | Ovid            | Journal of Bone & Joint Surgery - American Volume                             |
| 5                     | Tamaoki et al.      | Treatment of Displaced Midshaft Clavicle Fractures: Figure-of-Eight Harness Versus Anterior Plate Osteosynthesis: A Randomized Controlled Trial                                                                                                   | 2017 | Ovid            | Journal of Bone & Joint Surgery - American Volume                             |
| 6                     | Tutuhaturuwa et al. | Clinical outcomes and predictors of patient satisfaction in displaced midshaft clavicle fractures in adults: Results from a retrospective multicentre study.                                                                                      | 2017 | Ovid            | Injury                                                                        |
| 7                     | Tiren et al.        | Superior clavicle plate with lateral extension for displaced lateral clavicle fractures: a prospective study.                                                                                                                                     | 2013 | Ovid            | <i>Journal of Orthopaedics &amp; Traumatology International Orthopaedics.</i> |
| 8                     | Lee et al.          | Comparison of the efficacy of hook plate versus tension band wire in the treatment of unstable fractures of the distal clavicle.                                                                                                                  | 2009 | Ovid            | Orthop Traumatol Surg Res.                                                    |
| 9                     | Lädemann et al.     | Functional recovery following early mobilization after middle third clavicle osteosynthesis for acute fractures or nonunion: A case-control study.                                                                                                | 2017 | Ovid            | Orthopaedics.                                                                 |
| 10                    | Hanselman et al.    | Operative Cost Comparison: Plating Versus Intramedullary Fixation for Clavicle Fractures.                                                                                                                                                         | 2016 | Ovid            | Surg Res.                                                                     |
| 11                    | Shields et al.      | Patient factors influencing return to work and cumulative financial claims after clavicle fractures in workers' compensation cases.                                                                                                               | 2016 | Ovid            | Orthopedics.                                                                  |
| 12                    | Walton et al.       | A cost analysis of internal fixation versus nonoperative treatment in adult midshaft clavicle fractures using multiple randomized controlled trials.                                                                                              | 2015 | Ovid            | J Shoulder Elbow Surg.                                                        |
| 13                    | Melean et al.       | Surgical treatment of displaced middle-third clavicular fractures: a prospective, randomized trial in a working compensation population.                                                                                                          | 2015 | Ovid            | J Orthop Trauma.                                                              |
| 14                    | Althausen et al.    | Clinical and financial comparison of operative and nonoperative treatment of displaced clavicle fractures.                                                                                                                                        | 2013 | Ovid            | J Shoulder Elbow Surg.                                                        |
| 15                    | Robinson et al.     | Open reduction and plate fixation versus nonoperative treatment for displaced midshaft clavicular fractures: a multicenter, randomized, controlled trial                                                                                          | 2013 | Ovid            | J Bone Joint Surg Am.                                                         |
| 16                    | Lai et al.          | Comparison of dynamic and locked compression plates for treating midshaft clavicle fractures.                                                                                                                                                     | 2012 | Ovid            | Orthopedics.                                                                  |
| 17                    | Pearson et al.      | Is surgery for displaced, midshaft clavicle fractures in adults cost-effective? Results based on a multicenter randomized, controlled trial.                                                                                                      | 2010 | Ovid            | J Orthop Trauma.                                                              |
| <b>SCOPUS search:</b> |                     |                                                                                                                                                                                                                                                   |      |                 |                                                                               |
|                       |                     |                                                                                                                                                                                                                                                   |      | <b>Results:</b> |                                                                               |
|                       |                     |                                                                                                                                                                                                                                                   |      | <b>509</b>      |                                                                               |
| 18                    | Sørensen et al.     | Operative Treatment of Displaced Midshaft Clavicular Fractures Is Not Cost-Effective                                                                                                                                                              | 2020 | Scopus          | J Shoulder Elbow Surg                                                         |
| 19                    | Fox et al.          | Neer Type-II Distal Clavicle Fractures: A Cost-Effectiveness Analysis of Fixation Techniques                                                                                                                                                      | 2020 | Scopus          | J Bone Joint Surg Am                                                          |
| 20                    | Herteleer et al.    | Healthcare Utilization and Related Cost of Midshaft Clavicle Fracture Treatment in Belgium                                                                                                                                                        | 2020 | Scopus          | Eur J Trauma Emerg Surg                                                       |
| 21                    | Nicolson et al.     | Routine Fixation of Displaced Midshaft Clavicle Fractures Is Not Cost-Effective: A Cost Analysis From a Randomized Controlled Trial                                                                                                               | 2019 | Scopus          | Bone Joint J                                                                  |

|    |                    |                                                                                                                                                                                                                                                   |      |        |                                                     |
|----|--------------------|---------------------------------------------------------------------------------------------------------------------------------------------------------------------------------------------------------------------------------------------------|------|--------|-----------------------------------------------------|
| 22 | Benson et al.      | My Clavicle Fracture Definitely Warrants Surgery-Or Not So Much?: Commentary on an article by Jane Liu, MD, et al.: "Cost-Effectiveness of Operative Versus Nonoperative Treatment of Displaced Midshaft Clavicle Fractures: A Decision Analysis" | 2019 | Scopus | Journal of Bone & Joint Surgery - American Volume   |
| 23 | Liu et al.         | Cost-Effectiveness of Operative Versus Nonoperative Treatment of Displaced Midshaft Clavicle Fractures: A Decision Analysis.                                                                                                                      | 2019 | Scopus | Journal of Bone & Joint Surgery - American Volume   |
| 24 | Tamaoki et al.     | Treatment of Displaced Midshaft Clavicle Fractures: Figure-of-Eight Harness Versus Anterior Plate Osteosynthesis: A Randomized Controlled Trial                                                                                                   | 2017 | Scopus | Journal of Bone & Joint Surgery - American Volume   |
| 25 | Walton et al.      | A cost analysis of internal fixation versus nonoperative treatment in adult midshaft clavicle fractures using multiple randomized controlled trials                                                                                               | 2015 | Scopus | J Orthop Trauma.                                    |
| 26 | Melean et al.      | Surgical treatment of displaced middle-third clavicular fractures: A prospective, randomized trial in a working compensation population                                                                                                           | 2015 | Scopus | Journal of Shoulder and Elbow Surgery               |
| 27 | Douraiswami et al. | Open reduction and plating for displaced mid third clavicle fractures - A prospective study                                                                                                                                                       | 2013 | Scopus | Journal of Clinical Orthopaedics and Trauma         |
| 28 | Robinson et al.    | Open reduction and plate fixation versus nonoperative treatment for displaced midshaft clavicular fractures: a multicenter, randomized, controlled trial                                                                                          | 2013 | Scopus | J Bone Joint Surg Am.                               |
| 29 | Böhme et al.       | Current treatment concepts for mid-shaft fractures of the clavicle - Results of a prospective multicentre study   [Aktuelle Behandlungskonzepte der Klavikulaschaftfraktur - Ergebnisse einer prospektiven Multicenterstudie]                     | 2011 | Scopus | Zeitschrift für Orthopädie und Unfallchirurgie      |
| 30 | Lädemann et al.    | Functional recovery following early mobilization after middle third clavicle osteosynthesis for acute fractures or nonunion: A case-control study                                                                                                 | 2017 | Scopus | Orthopaedics and Traumatology: Surgery and Research |
| 31 | Hanselman et al.   | Operative cost comparison: Plating versus intramedullary fixation for clavicle fractures                                                                                                                                                          | 2016 | Scopus | Orthopaedics                                        |
| 32 | Shields et al.     | Patient factors influencing return to work and cumulative financial claims after clavicle fractures in workers' compensation cases                                                                                                                | 2016 | Scopus | Journal of Shoulder and Elbow Surgery               |
| 33 | Althausen et al.   | Clinical and financial comparison of operative and nonoperative treatment of displaced clavicle fractures                                                                                                                                         | 2013 | Scopus | Journal of Shoulder and Elbow Surgery               |
| 34 | Pearson et al.     | Is surgery for displaced, midshaft clavicle fractures in adults cost-effective? Results based on a multicenter randomized, controlled trial                                                                                                       | 2010 | Scopus | Journal of Orthopaedic Trauma                       |

| Nr: | Author              | Title                                                                                                                                                                                                                                             | Year | Source          | Journal                                           |
|-----|---------------------|---------------------------------------------------------------------------------------------------------------------------------------------------------------------------------------------------------------------------------------------------|------|-----------------|---------------------------------------------------|
|     |                     |                                                                                                                                                                                                                                                   |      | <b>Results:</b> |                                                   |
|     |                     |                                                                                                                                                                                                                                                   |      | <b>421</b>      |                                                   |
| 35  | Sørensen et al.     | Operative Treatment of Displaced Midshaft Clavicular Fractures Is Not Cost-Effective                                                                                                                                                              | 2020 | Web of science  | J Shoulder Elbow Surg                             |
| 36  | Benson et al.       | My Clavicle Fracture Definitely Warrants Surgery-Or Not So Much?: Commentary on an article by Jane Liu, MD, et al.: "Cost-Effectiveness of Operative Versus Nonoperative Treatment of Displaced Midshaft Clavicle Fractures: A Decision Analysis" | 2019 | Web of science  | Journal of Bone & Joint Surgery - American Volume |
| 37  | Liu et al.          | Cost-Effectiveness of Operative Versus Nonoperative Treatment of Displaced Midshaft Clavicle Fractures: A Decision Analysis.                                                                                                                      | 2019 | Web of science  | Journal of Bone & Joint Surgery - American Volume |
| 38  | Tamaoki et al.      | Treatment of Displaced Midshaft Clavicle Fractures: Figure-of-Eight Harness Versus Anterior Plate Osteosynthesis: A Randomized Controlled Trial                                                                                                   | 2017 | Web of science  | Journal of Bone & Joint Surgery - American Volume |
| 39  | Serrano et al.      | Anterior-Inferior Plating Results in Fewer Secondary Interventions Compared to Superior Plating for Acute Displaced Midshaft Clavicle Fractures.                                                                                                  | 2017 | Web of science  | Journal of Orthopaedic Trauma,                    |
| 40  | Melean et al.       | Surgical treatment of displaced middle-third clavicular fractures: A prospective, randomized trial in a working compensation population                                                                                                           | 2015 | Web of science  | Journal of Shoulder and Elbow Surgery             |
| 41  | Hanselman et al.    | Operative Cost Comparison: Plating Versus Intramedullary Fixation for Clavicle Fractures                                                                                                                                                          | 2016 | Web of Science  | Orthopaedics                                      |
| 42  | Shields et al.      | Patient factors influencing return to work and cumulative financial claims after clavicle fractures in workers' compensation cases                                                                                                                | 2016 | Web of Science  | JOURNAL OF SHOULDER AND ELBOW SURGERY             |
| 43  | Bliss et al.        | Does Insurance Status Affect the Management of Acute Clavicle Fractures?                                                                                                                                                                          | 2016 | Web of Science  | JOURNAL OF ORTHOPAEDIC TRAUMA                     |
| 44  | Walton et al.       | A Cost Analysis of Internal Fixation Versus Nonoperative Treatment in Adult Midshaft Clavicle Fractures Using Multiple Randomized Controlled Trials                                                                                               | 2015 | Web of Science  | JOURNAL OF ORTHOPAEDIC TRAUMA                     |
| 45  | Frischknecht et al. | Internal fixation of the midshaft clavicle with 3.5mm reconstruction LC-Plate - a safe, adaptable and cost effective option                                                                                                                       | 2014 | Web of Science  | BRITISH JOURNAL OF SURGERY                        |

|    |                 |                                                                                                                                                         |      |                |                                             |
|----|-----------------|---------------------------------------------------------------------------------------------------------------------------------------------------------|------|----------------|---------------------------------------------|
| 46 | Robinson et al. | Open Reduction and Plate Fixation Versus Nonoperative Treatment for Displaced Midshaft Clavicular Fractures A Multicenter, Randomized, Controlled Trial | 2013 | Web of Science | JOURNAL OF BONE AND JOINT SURGERY- AMERICAN |
| 47 | Pearson et al.  | Is Surgery for Displaced, Midshaft Clavicle Fractures in Adults Cost-Effective? Results Based on a Multicenter Randomized, Controlled Trial             | 2010 | Web of Science | JOURNAL OF ORTHOPAEDIC TRAUMA               |

| Nr: | Author EBSCO host search: | Title                                                                                                                                                                                                                                             | Year | Source     | Journal                                                 |
|-----|---------------------------|---------------------------------------------------------------------------------------------------------------------------------------------------------------------------------------------------------------------------------------------------|------|------------|---------------------------------------------------------|
|     |                           |                                                                                                                                                                                                                                                   |      |            | <b>Results:</b><br><b>906</b>                           |
| 48  | Fox et al.                | Neer Type-II Distal Clavicle Fractures: A Cost-Effectiveness Analysis of Fixation Techniques                                                                                                                                                      | 2020 | EBSCO host | J Bone Joint Surg Am                                    |
| 49  | Morales et al.            | Potential Economic Benefits of Limited Clinical and Radiographic Follow-up After Plate Fixation of Midshaft Clavicle Fractures                                                                                                                    | 2019 | EBSCO host | Journal of the American Academy of Orthopaedic Surgeons |
| 50  | Benson et al.             | My Clavicle Fracture Definitely Warrants Surgery-Or Not So Much?: Commentary on an article by Jane Liu, MD, et al.: "Cost-Effectiveness of Operative Versus Nonoperative Treatment of Displaced Midshaft Clavicle Fractures: A Decision Analysis" | 2019 | EBSCO host | Journal of Bone & Joint Surgery - American Volume       |
| 51  | Liu et al.                | Cost-Effectiveness of Operative Versus Nonoperative Treatment of Displaced Midshaft Clavicle Fractures: A Decision Analysis.                                                                                                                      | 2019 | EBSCO host | Journal of Bone & Joint Surgery - American Volume       |
| 52  | Tamaoki et al.            | Treatment of Displaced Midshaft Clavicle Fractures: Figure-of-Eight Harness Versus Anterior Plate Osteosynthesis: A Randomized Controlled Trial                                                                                                   | 2017 | EBSCO host | Journal of Bone & Joint Surgery - American Volume       |
| 53  | Serrano et al.            | Anterior-Inferior Plating Results in Fewer Secondary Interventions Compared to Superior Plating for Acute Displaced Midshaft Clavicle Fractures.                                                                                                  | 2017 | EBSCO host | Journal of Orthopaedic Trauma,                          |
| 54  | Hanselman et al.          | Operative Cost Comparison: Plating Versus Intramedullary Fixation for Clavicle Fractures.                                                                                                                                                         | 2016 | EBSCO host | Orthopedics                                             |
| 55  | Mcphillamy et al.         | The Clinical and Economic Impact of Generic Locking Plate Utilization at a Level II Trauma Center.                                                                                                                                                | 2016 | EBSCO host | Journal Of Orthopaedic Trauma                           |
| 56  | Shields et al.            | Patient factors influencing return to work and cumulative financial claims after clavicle fractures in workers' compensation cases.                                                                                                               | 2016 | EBSCO host | Journal Of Shoulder And Elbow Surgerv                   |
| 57  | Melean et al.             | Surgical treatment of displaced middle-third clavicular fractures: A prospective, randomized trial in a working compensation population                                                                                                           | 2015 | EBSCO host | Journal of Shoulder and Elbow Surgerv                   |
| 58  | Walton et al.             | A cost analysis of internal fixation versus nonoperative treatment in adult midshaft clavicle fractures using multiple randomized controlled trials.                                                                                              | 2015 | EBSCO host | Journal of Orthopaedic Trauma (J ORTHOP TRAUMA)         |
| 59  | Robinson et al.           | Open reduction and plate fixation versus nonoperative treatment for displaced midshaft clavicular fractures: a multicenter, randomized, controlled trial                                                                                          | 2013 | EBSCO host | The Journal Of Bone And Joint Surgery.                  |
| 60  | Althausen et al.          | Clinical and financial comparison of operative and nonoperative treatment of displaced clavicle fractures.                                                                                                                                        | 2013 | EBSCO host | Journal Of Shoulder And Elbow Surgerv                   |
| 61  | Böhme et al.              | Current treatment concepts for mid-shaft fractures of the clavicle - Results of a prospective multicentre study   [Aktuelle Behandlungskonzepte der Klavikulaschaffraktur - Ergebnisse einer prospektiven Multicenterstudie]                      | 2011 | EBSCO host | Zeitschrift fur Orthopadie und Unfallchirurgie          |
| 62  | Pearson et al.            | Is surgery for displaced, midshaft clavicle fractures in adults cost-effective? Results based on a multicenter randomized, controlled trial.                                                                                                      | 2010 | EBSCO host | Journal of Orthopaedic Trauma (J ORTHOP TRAUMA)         |

| Nr: | Author PubMed search: | Title                                                                                                                                                                      | Year | Source  | Journal                       |
|-----|-----------------------|----------------------------------------------------------------------------------------------------------------------------------------------------------------------------|------|---------|-------------------------------|
|     |                       |                                                                                                                                                                            |      |         | <b>Results:</b><br><b>531</b> |
| 63  | Sørensen et al.       | Operative Treatment of Displaced Midshaft Clavicular Fractures Is Not Cost-Effective                                                                                       | 2020 | Pub Med | J Shoulder Elbow Surg         |
| 64  | Fox et al.            | Neer Type-II Distal Clavicle Fractures: A Cost-Effectiveness Analysis of Fixation Techniques                                                                               | 2020 | Pub Med | J Bone Joint Surg Am          |
| 65  | Herteleer et al.      | Healthcare Utilization and Related Cost of Midshaft Clavicle Fracture Treatment in Belgium                                                                                 | 2020 | Pub Med | Eur J Trauma Emerg Surg       |
| 66  | Putnam et al.         | Surgical Treatment, Complications, and Reimbursement Among Patients With Clavicle Fracture and Acromioclavicular Dislocations: A US Retrospective Claims Database Analysis | 2019 | Pub Med | J Med Econ                    |
| 67  | Nicolson et al.       | Routine Fixation of Displaced Midshaft Clavicle Fractures Is Not Cost-Effective: A Cost Analysis From a Randomized Controlled Trial                                        | 2019 | Pub Med | Bone Joint J                  |

|    |                   |                                                                                                                                                                                                                                                   |      |         |                                                   |
|----|-------------------|---------------------------------------------------------------------------------------------------------------------------------------------------------------------------------------------------------------------------------------------------|------|---------|---------------------------------------------------|
| 68 | Benson et al.     | My Clavicle Fracture Definitely Warrants Surgery-Or Not So Much?: Commentary on an article by Jane Liu, MD, et al.: "Cost-Effectiveness of Operative Versus Nonoperative Treatment of Displaced Midshaft Clavicle Fractures: A Decision Analysis" | 2019 | Pub Med | Journal of Bone & Joint Surgery - American Volume |
| 69 | Lui et al.        | Cost-Effectiveness of Operative Versus Nonoperative Treatment of Displaced Midshaft Clavicle Fractures: A Decision Analysis.                                                                                                                      | 2019 | Pub Med | Journal of Bone & Joint Surgery - American Volume |
| 70 | Tamaoki et al.    | Treatment of Displaced Midshaft Clavicle Fractures: Figure-of-Eight Harness Versus Anterior Plate Osteosynthesis: A Randomized Controlled Trial                                                                                                   | 2017 | Pub Med | Journal of Bone & Joint Surgery - American Volume |
| 71 | Althausen et al.  | Clinical and financial comparison of operative and nonoperative treatment of displaced clavicle fractures.                                                                                                                                        | 2013 | Pub Med | J Shoulder Elbow Surg.                            |
| 72 | Pearson et al.    | Is surgery for displaced, midshaft clavicle fractures in adults cost-effective? Results based on a multicenter randomized, controlled trial.                                                                                                      | 2010 | Pub Med | J Orthop Trauma.                                  |
| 73 | Lai et al.        | Comparison of dynamic and locked compression plates for treating midshaft clavicle fractures.                                                                                                                                                     | 2012 | Pub Med | Orthopedics.                                      |
| 74 | Meijer et al.     | In response.                                                                                                                                                                                                                                      | 2015 | Pub Med | J Orthop Trauma.                                  |
| 75 | Qamar et al.      | Double semi-tubular plating of clavicle using a piggyback technique--an alternative way of treating clavicle mid-shaft fractures in young patients.                                                                                               | 2011 | Pub Med | Acta Orthop Belg.                                 |
| 76 | Walton et al.     | A cost analysis of internal fixation versus nonoperative treatment in adult midshaft clavicle fractures using multiple randomized controlled trials.                                                                                              | 2015 | Pub Med | J Orthop Trauma.                                  |
| 77 | Robinson et al.   | Open reduction and plate fixation versus nonoperative treatment for displaced midshaft clavicular fractures: a multicenter, randomized, controlled trial                                                                                          | 2013 | Pub Med | J Bone Joint Surg Am.                             |
| 78 | Garq et al.       | Displaced middle-third fractures of the clavicle-operative management.                                                                                                                                                                            | 2011 | Pub Med | J Indian Med Assoc                                |
| 79 | Li et al.         | [Surgical and nonsurgical treatment of clavicular midpiece fracture in adults: a case-control study].                                                                                                                                             | 2012 | Pub Med | Zhongguo Gu Shang.                                |
| 80 | Rehn et al.       | Operative versus nonoperative treatment of displaced midshaft clavicle fractures in adults: a systematic review                                                                                                                                   | 2014 | Pub Med | Eur J Orthop Surg Traumatol.                      |
| 81 | Melean et al.     | Surgical treatment of displaced middle-third clavicular fractures: a prospective, randomized trial in a working compensation population.                                                                                                          | 2015 | Pub Med | J Shoulder Elbow Surg.                            |
| 82 | Hanselman et al.  | Operative Cost Comparison: Plating Versus Intramedullary Fixation for Clavicle Fractures.                                                                                                                                                         | 2016 | Pub Med | Orthopedics.                                      |
| 83 | Durak et al.      | [Results of conservative treatment of midclavicular fractures].                                                                                                                                                                                   | 2002 | Pub Med | Ulus Travma Derg.                                 |
| 84 | Shields et al.    | Patient factors influencing return to work and cumulative financial claims after clavicle fractures in workers' compensation cases.                                                                                                               | 2016 | Pub Med | J Shoulder Elbow Surg.                            |
| 85 | Zhang et al.      | [Minimally invasive treatment for fresh acromioclavicular dislocation and the distal clavicle fracture].                                                                                                                                          | 2011 | Pub Med | Zhongguo Gu Shang.                                |
| 86 | Czajka et al.     | Symptomatic Implant Removal Following Dual Mini-Fragment Plating for Clavicular Shaft Fractures.                                                                                                                                                  | 2017 | Pub Med | J Orthop Trauma.                                  |
| 87 | Mackey et al.     | Effects of antiresorptive treatment on nonvertebral fracture outcomes.                                                                                                                                                                            | 2011 | Pub Med | J Bone Miner Res.                                 |
| 88 | Lu et al.         | Superior versus anteroinferior plating of displaced midshaft clavicular fracture in patients older than 60 years.                                                                                                                                 | 2017 | Pub Med | J Int Med Res.                                    |
| 89 | Läderrmann et al. | Functional recovery following early mobilization after middle third clavicle osteosynthesis for acute fractures or nonunion: A case-control study.                                                                                                | 2017 | Pub Med | Orthop Traumatol Surg Res.                        |
